# Supplementary material for: Isolating the Role of Bone Lacunar Morphology on Static and Fatigue Fracture Progression through Numerical Simulations
Source: MDPI journal article supplement (doi:10.3390/ma16051931), 2023-02-26
Supplement: s1 [file s1]

**Table S1.** Identification of the displacement at which the force peak occurs for all the considered geometries when using the lower DAF value.

| Category | Peak Force [N] | Displacement [mm] |
|----------|----------------|-------------------|
| OP       | 40,944         | 0.031             |
| PET      | 44,985         | 0.033             |
| PETna    | 45,637         | 0.034             |
| PET2     | 46,681         | 0.034             |
| OP2      | 48,067         | 0.035             |
| PET2na   | 49,000         | 0.035             |

**Table S2.** Identification of lacunae that are sites of damage initiation in static-XFEM simulations and recap of the total number of lacunae involved in damage initiation for each category.

| Category | $\alpha$ Region | $\beta$ Region | $\gamma$ Region | N° of Lacunae<br>Involved by<br>Damage |
|----------|-----------------|----------------|-----------------|----------------------------------------|
| OP       | 2–4, 6          | 1–8            | 1, 3–6          | 17                                     |
| OP2      | -               | 2              | 3, 4            | 3                                      |
| PET      | 1, 2            | 4–7            | 1, 3–5          | 10                                     |
| PET2     | -               | 3, 4           | 1, 3, 4         | 5                                      |
| PETna    | 2–4             | 1, 4, 6        | 1–4             | 10                                     |
| PET2na   | -               | -              | 5               | 1                                      |
